# Supplementary material for: Experimental and theoretical study on molecular aggregation and its effect on the photo-physical properties of the mesogenic bi-1,3,4-thiadiazole derivative
Source: Royal Society of Chemistry journal article supplement (doi:10.1039/c1cp20092e), 2011-01-01
Supplement: c1cp20092e.pdf [file c1cp20092e.pdf]

## Experimental and Theoretical study on molecular aggregation and its effect on photo-physical properties of mesogenic bi-1,3,4-thiadiazole derivative

Haitao Wang,<sup>a,b</sup> Fu-Quan Bai,<sup>b</sup> Huimin Liu,<sup>a</sup> Binglian Bai,<sup>c</sup> Ran Xia,<sup>a</sup> Songnan Qu,<sup>d</sup>  
Jianhua Shi,<sup>a</sup> Dajun Xie,<sup>a</sup> Hui-Ying Li,<sup>c</sup> Min Li,<sup>a,\*</sup> Hong-Xing Zhang<sup>b,\*</sup>

Corresponding author: Min Li [minli@mail.jlu.edu.cn](mailto:minli@mail.jlu.edu.cn) (experimental); Hong-Xing Zhang [zhanghx@mail.jlu.edu.cn](mailto:zhanghx@mail.jlu.edu.cn) (theoretical)

|                  |                                                                                                                    |   |
|------------------|--------------------------------------------------------------------------------------------------------------------|---|
| <b>Figure S1</b> | M062x/6-31G** Potential Energy Curve of BTD-1 dimer for the face-to-face molecular packing geometry.               | 2 |
| <b>Figure S2</b> | M062x/6-31G** Potential Energy Curve of BTD-1 dimer for the intermolecular displacement along molecular long axis. | 2 |
| <b>Table S1</b>  | M062x/6-311+G** monomer Structure of BTD-1. Cartesian Coordinates in Å.                                            | 3 |
| <b>Table S2</b>  | M062x/6-31G** BTD-1 dimer Structure of minimum 1 (M1). Cartesian Coordinates in Å.                                 | 5 |
| <b>Table S3</b>  | M062x/6-31G** BTD-1 dimer Structure of minimum 2 (M2). Cartesian Coordinates in Å.                                 | 7 |

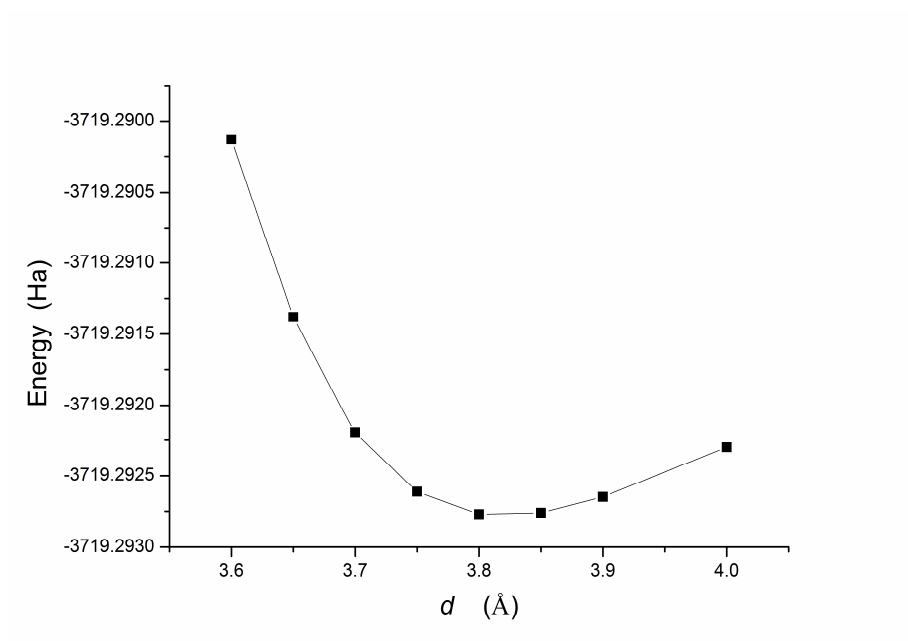

**Figure S1** M062x/6-31G\*\* Potential Energy Curve of BTD-1 dimer for the face-to-face molecular packing geometry.

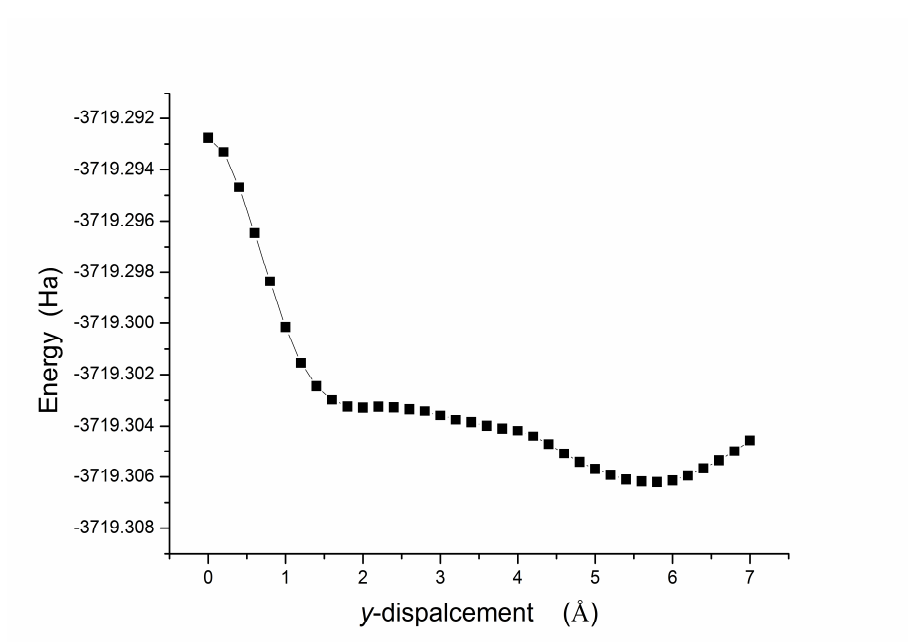

**Figure S2** M062x/6-31G\*\* Potential Energy Curve of BTD-1 dimer for the intermolecular displacement along molecular long axis.

**Table S1** M062x/6-311+G\*\* monomer Structure of BTD-1. Cartesian Coordinates in

Å.

| Energy (Ha) | -1859.96453340 |           |           |
|-------------|----------------|-----------|-----------|
| Atom        | X              | Y         | Z         |
| C           | 0.420814       | 3.059754  | 0.000000  |
| C           | -0.001151      | 0.726505  | 0.000000  |
| N           | -1.088265      | 1.434119  | 0.000000  |
| N           | -0.848498      | 2.764289  | 0.000000  |
| S           | 1.457218       | 1.659486  | 0.000000  |
| C           | 0.001151       | -0.726505 | 0.000000  |
| C           | -0.420814      | -3.059754 | 0.000000  |
| N           | 0.848498       | -2.764289 | 0.000000  |
| N           | 1.088265       | -1.434119 | 0.000000  |
| S           | -1.457218      | -1.659486 | 0.000000  |
| C           | 0.923889       | 4.436919  | 0.000000  |
| C           | 0.013637       | 5.492960  | 0.000000  |
| C           | 2.293950       | 4.726233  | 0.000000  |
| C           | 0.449413       | 6.811391  | 0.000000  |
| H           | -1.045963      | 5.269251  | 0.000000  |
| C           | 2.738758       | 6.033171  | 0.000000  |
| H           | 3.022918       | 3.922689  | 0.000000  |
| C           | 1.818694       | 7.086225  | 0.000000  |
| H           | -0.281146      | 7.608406  | 0.000000  |
| H           | 3.795105       | 6.270411  | 0.000000  |
| C           | -0.923889      | -4.436919 | 0.000000  |
| C           | -0.013637      | -5.492960 | 0.000000  |
| C           | -2.293950      | -4.726233 | 0.000000  |
| C           | -0.449413      | -6.811391 | 0.000000  |
| H           | 1.045963       | -5.269251 | 0.000000  |
| C           | -2.738758      | -6.033171 | 0.000000  |
| H           | -3.022918      | -3.922689 | 0.000000  |
| C           | -1.818694      | -7.086225 | 0.000000  |
| H           | 0.281146       | -7.608406 | 0.000000  |
| H           | -3.795105      | -6.270411 | 0.000000  |
| O           | -2.347643      | -8.330757 | 0.000000  |
| C           | -1.457218      | -9.429652 | 0.000000  |
| H           | -0.826832      | -9.425011 | 0.894193  |
| H           | -2.080578      | 10.320510 | 0.000000  |
| H           | -0.826832      | -9.425011 | -0.894193 |
| O           | 2.347643       | 8.330757  | 0.000000  |
| C           | 1.457218       | 9.429652  | 0.000000  |
| H           | 2.080578       | 10.320510 | 0.000000  |
| H           | 0.826832       | 9.425011  | -0.894193 |

---

|   |          |          |          |
|---|----------|----------|----------|
| H | 0.826832 | 9.425011 | 0.894193 |
|---|----------|----------|----------|

---

**Table S2** M062x/6-31G\*\* BTD-1 dimer Structure of minimum 1 (M1). Cartesian  
 Coordinates in Å.

| Energy (Ha) | -3719.314123731118 |             |            |
|-------------|--------------------|-------------|------------|
| Atom        | X                  | Y           | Z          |
| C           | -0.03596400        | 8.67952900  | 1.50000000 |
| C           | 0.04519100         | 6.30982000  | 1.50000000 |
| N           | -1.16700800        | 6.77145500  | 1.50000000 |
| N           | -1.21404900        | 8.12224200  | 1.50000000 |
| S           | 1.27319600         | 7.53018900  | 1.50000000 |
| C           | 0.35480900         | 4.89018000  | 1.50000000 |
| C           | 0.43596400         | 2.52047100  | 1.50000000 |
| N           | 1.61404900         | 3.07775800  | 1.50000000 |
| N           | 1.56700800         | 4.42854500  | 1.50000000 |
| S           | -0.87319600        | 3.66981100  | 1.50000000 |
| C           | 0.16440300         | 10.13194800 | 1.50000000 |
| C           | -0.94864300        | 10.97153700 | 1.50000000 |
| C           | 1.44225800         | 10.70453500 | 1.50000000 |
| C           | -0.80162800        | 12.35231500 | 1.50000000 |
| H           | -1.93694100        | 10.52874500 | 1.50000000 |
| C           | 1.60053200         | 12.07599100 | 1.50000000 |
| H           | 2.32470900         | 10.07338000 | 1.50000000 |
| C           | 0.47852800         | 12.91058500 | 1.50000000 |
| H           | -1.68425300        | 12.97675200 | 1.50000000 |
| H           | 2.58278800         | 12.53132000 | 1.50000000 |
| C           | 0.23559700         | 1.06805200  | 1.50000000 |
| C           | 1.34864300         | 0.22846300  | 1.50000000 |
| C           | -1.04225800        | 0.49546500  | 1.50000000 |
| C           | 1.20162800         | -1.15231500 | 1.50000000 |
| H           | 2.33694100         | 0.67125500  | 1.50000000 |
| C           | -1.20053200        | -0.87599100 | 1.50000000 |
| H           | -1.92470900        | 1.12662000  | 1.50000000 |
| C           | -0.07852800        | -1.71058500 | 1.50000000 |
| H           | 2.08425300         | -1.77675200 | 1.50000000 |
| H           | -2.18278800        | -1.33132000 | 1.50000000 |
| O           | -0.33224100        | -3.03884600 | 1.50000000 |
| C           | 0.77049200         | -3.92451400 | 1.50000000 |
| H           | 1.38563100         | -3.78662700 | 2.39419300 |
| H           | 0.34969000         | -4.92707600 | 1.50000000 |
| H           | 1.38563100         | -3.78662700 | 0.60580700 |
| O           | 0.73224100         | 14.23884600 | 1.50000000 |
| C           | -0.37049200        | 15.12451400 | 1.50000000 |
| H           | 0.05031000         | 16.12707600 | 1.50000000 |
| H           | -0.98563100        | 14.98662700 | 0.60580700 |

---

|   |             |              |             |
|---|-------------|--------------|-------------|
| H | -0.98563100 | 14.98662700  | 2.39419300  |
| C | -0.23596443 | 3.07952914   | -1.90000000 |
| C | -0.15480861 | 0.70982049   | -1.90000000 |
| N | -1.36700839 | 1.17145469   | -1.90000000 |
| N | -1.41404934 | 2.52224245   | -1.90000000 |
| S | 1.07319581  | 1.93018881   | -1.90000000 |
| C | 0.15480861  | -0.70982049  | -1.90000000 |
| C | 0.23596443  | -3.07952914  | -1.90000000 |
| N | 1.41404934  | -2.52224245  | -1.90000000 |
| N | 1.36700839  | -1.17145469  | -1.90000000 |
| S | -1.07319581 | -1.93018881  | -1.90000000 |
| C | -0.03559736 | 4.53194814   | -1.90000000 |
| C | -1.14864325 | 5.37153742   | -1.90000000 |
| C | 1.24225774  | 5.10453530   | -1.90000000 |
| C | -1.00162770 | 6.75231526   | -1.90000000 |
| H | -2.13694115 | 4.92874499   | -1.90000000 |
| C | 1.40053211  | 6.47599085   | -1.90000000 |
| H | 2.12470934  | 4.47338043   | -1.90000000 |
| C | 0.27852814  | 7.31058511   | -1.90000000 |
| H | -1.88425316 | 7.37675233   | -1.90000000 |
| H | 2.38278830  | 6.93131993   | -1.90000000 |
| C | 0.03559736  | -4.53194814  | -1.90000000 |
| C | 1.14864325  | -5.37153742  | -1.90000000 |
| C | -1.24225774 | -5.10453530  | -1.90000000 |
| C | 1.00162770  | -6.75231526  | -1.90000000 |
| H | 2.13694115  | -4.92874499  | -1.90000000 |
| C | -1.40053211 | -6.47599085  | -1.90000000 |
| H | -2.12470934 | -4.47338043  | -1.90000000 |
| C | -0.27852814 | -7.31058511  | -1.90000000 |
| H | 1.88425316  | -7.37675233  | -1.90000000 |
| H | -2.38278830 | -6.93131993  | -1.90000000 |
| O | -0.53224063 | -8.63884597  | -1.90000000 |
| C | 0.57049221  | -9.52451362  | -1.90000000 |
| H | 1.18563064  | -9.38662684  | -1.00580700 |
| H | 0.14968966  | -10.52707578 | -1.90000000 |
| H | 1.18563064  | -9.38662684  | -2.79419300 |
| O | 0.53224063  | 8.63884597   | -1.90000000 |
| C | -0.57049221 | 9.52451362   | -1.90000000 |
| H | -0.14968966 | 10.52707578  | -1.90000000 |
| H | -1.18563064 | 9.38662684   | -2.79419300 |
| H | -1.18563064 | 9.38662684   | -1.00580700 |

---

**Table S3** M062x/6-31G\*\* BTD-1 dimer Structure of minimum 2 (M2). Cartesian  
Coordinates in Å.

| Energy (Ha) | -3719.310341853164 |             |            |
|-------------|--------------------|-------------|------------|
| Atom        | X                  | Y           | Z          |
| C           | -0.23596405        | 3.95594843  | 1.51367675 |
| C           | -0.15480900        | 1.58891787  | 1.62631375 |
| N           | -1.36700801        | 2.05003107  | 1.60437134 |
| N           | -1.41404904        | 3.39929130  | 1.54016573 |
| S           | 1.07319597         | 2.80790753  | 1.56830716 |
| C           | 0.15480902         | 0.17088247  | 1.69379208 |
| C           | 0.23596407         | -2.19614808 | 1.80642909 |
| N           | 1.41404906         | -1.63949095 | 1.77994010 |
| N           | 1.36700803         | -0.29023072 | 1.71573449 |
| S           | -1.07319595        | -1.04810718 | 1.75179868 |
| C           | -0.03559708        | 5.40672578  | 1.44464036 |
| C           | -1.14864310        | 6.24536579  | 1.40473303 |
| C           | 1.24225791         | 5.97866562  | 1.41742414 |
| C           | -1.00162812        | 7.62458312  | 1.33910189 |
| H           | -2.13694109        | 5.80307425  | 1.42577984 |
| C           | 1.40053188         | 7.34857149  | 1.35223609 |
| H           | 2.12470892         | 5.34822402  | 1.44742418 |
| C           | 0.27852787         | 8.18222214  | 1.31256618 |
| H           | -1.88425314        | 8.24831431  | 1.30942117 |
| H           | 2.38278787         | 7.80338586  | 1.33059337 |
| C           | 0.03559710         | -3.64692544 | 1.87546547 |
| C           | 1.14864311         | -4.48556544 | 1.91537280 |
| C           | -1.24225789        | -4.21886527 | 1.90268170 |
| C           | 1.00162814         | -5.86478277 | 1.98100394 |
| H           | 2.13694111         | -4.04327390 | 1.89432599 |
| C           | -1.40053186        | -5.58877114 | 1.96786975 |
| H           | -2.12470890        | -3.58842368 | 1.87268165 |
| C           | -0.27852785        | -6.42242179 | 2.00753965 |
| H           | 1.88425315         | -6.48851396 | 2.01068467 |
| H           | -2.38278785        | -6.04358551 | 1.98951246 |
| O           | -0.53224082        | -7.74918148 | 2.07067456 |
| C           | 0.57049220         | -8.63384841 | 2.11277211 |
| H           | 1.18563121         | -8.45361446 | 2.99940036 |
| H           | 0.14969022         | -9.63527723 | 2.16042590 |
| H           | 1.18563118         | -8.53862003 | 1.21303575 |
| O           | 0.53224084         | 9.50898183  | 1.24943128 |
| C           | -0.57049218        | 10.39364875 | 1.20733372 |
| H           | -0.14969020        | 11.39507758 | 1.15967994 |
| H           | -1.18563119        | 10.21341481 | 0.32070547 |

---

|   |             |              |             |
|---|-------------|--------------|-------------|
| H | -1.18563116 | 10.29842038  | 2.10707008  |
| C | -0.23596407 | 2.19614808   | -1.80642909 |
| C | -0.15480902 | -0.17088247  | -1.69379208 |
| N | -1.36700803 | 0.29023072   | -1.71573449 |
| N | -1.41404906 | 1.63949095   | -1.77994010 |
| S | 1.07319595  | 1.04810718   | -1.75179868 |
| C | 0.15480900  | -1.58891787  | -1.62631375 |
| C | 0.23596405  | -3.95594843  | -1.51367675 |
| N | 1.41404904  | -3.39929130  | -1.54016573 |
| N | 1.36700801  | -2.05003107  | -1.60437134 |
| S | -1.07319597 | -2.80790753  | -1.56830716 |
| C | -0.03559710 | 3.64692544   | -1.87546547 |
| C | -1.14864311 | 4.48556544   | -1.91537280 |
| C | 1.24225789  | 4.21886527   | -1.90268170 |
| C | -1.00162814 | 5.86478277   | -1.98100394 |
| H | -2.13694111 | 4.04327390   | -1.89432599 |
| C | 1.40053186  | 5.58877114   | -1.96786975 |
| H | 2.12470890  | 3.58842368   | -1.87268165 |
| C | 0.27852785  | 6.42242179   | -2.00753965 |
| H | -1.88425315 | 6.48851396   | -2.01068467 |
| H | 2.38278785  | 6.04358551   | -1.98951246 |
| C | 0.03559708  | -5.40672578  | -1.44464036 |
| C | 1.14864310  | -6.24536579  | -1.40473303 |
| C | -1.24225791 | -5.97866562  | -1.41742414 |
| C | 1.00162812  | -7.62458312  | -1.33910189 |
| H | 2.13694109  | -5.80307425  | -1.42577984 |
| C | -1.40053188 | -7.34857149  | -1.35223609 |
| H | -2.12470892 | -5.34822402  | -1.44742418 |
| C | -0.27852787 | -8.18222214  | -1.31256618 |
| H | 1.88425314  | -8.24831431  | -1.30942117 |
| H | -2.38278787 | -7.80338586  | -1.33059337 |
| O | -0.53224084 | -9.50898183  | -1.24943128 |
| C | 0.57049218  | -10.39364875 | -1.20733372 |
| H | 1.18563119  | -10.21341481 | -0.32070547 |
| H | 0.14969020  | -11.39507758 | -1.15967994 |
| H | 1.18563116  | -10.29842038 | -2.10707008 |
| O | 0.53224082  | 7.74918148   | -2.07067456 |
| C | -0.57049220 | 8.63384841   | -2.11277211 |
| H | -0.14969022 | 9.63527723   | -2.16042590 |
| H | -1.18563121 | 8.45361446   | -2.99940036 |
| H | -1.18563118 | 8.53862003   | -1.21303575 |

---
